# Supplementary material for: Machine learning reveals chronic graft-versus-host disease phenotypes and stratifies survival after stem cell transplant for hematologic malignancies
Source: PubMed Central journal article supplement — Haematologica. 2018 Sep 20;104(1):189–96. doi: 10.3324/haematol.2018.193441 (PMC6312024; doi:10.3324/haematol.2018.193441), 2019-01
Supplement: 2018_193441-Disclosures_and_Contributions.pdf [file 2018_193441-Disclosures_and_Contributions.pdf]

Haematologica  
HAEMATOL/2018/193441  
Version 3

Machine learning reveals chronic graft-versus-host disease phenotypes  
and stratifies survival after stem cell transplant for hematologic  
malignancies

Jocelyn S. Gandelman, Michael T. Byrne, Akshitkumar M. Mistry,  
Hannah G. Polikowsky, Kirsten E. Diggins, Heidi Chen, Stephanie J.  
Lee, Mukta Arora, Corey Cutler, Mary Flowers, Joseph Pidala,  
Jonathan M. Irish, and Madan H. Jagasia

Disclosures: 1. This work was supported by funding from The Vanderbilt Medical Scholars Program and Vanderbilt Ingram Cancer Center. 2. JSG, MTB, AMM, KED, HC, SJL, MA, CC, MF, JP and MHJ have nothing to disclose. HGP is an employee at Cytobank Inc. JMI is co-founder and board member at Cytobank Inc. 3. Initial steps have been taken to obtain a provisional patent for the decision tree described in this paper. We may also apply for a patent for the process of converting the machine learning workflow into a decision tree.

Contributions: JSG, JMI, and MHJ developed and oversaw the study. MTB and JSG formatted data for analysis. JSG, AMM, JMI, HC, and MHJ helped perform statistical analyses. SJL, MA, MF, JP, MHJ collected and reviewed clinical data. JMI, KED, JSG and HGP provided insight into optimizing the machine learning workflow. JSG, JMI and MHJ wrote the paper. All authors revised and approved the final version of the manuscript.
